# Supplementary material for: Large-scale gene trapping in C57BL/6N mouse embryonic stem cells
Source: HighWire-hosted journal article supplement (doi:10.1101/gr.078352.108), 2008-09-17

# OmniBankII sequence annotation pipeline

## 1. Consensus sequence generation

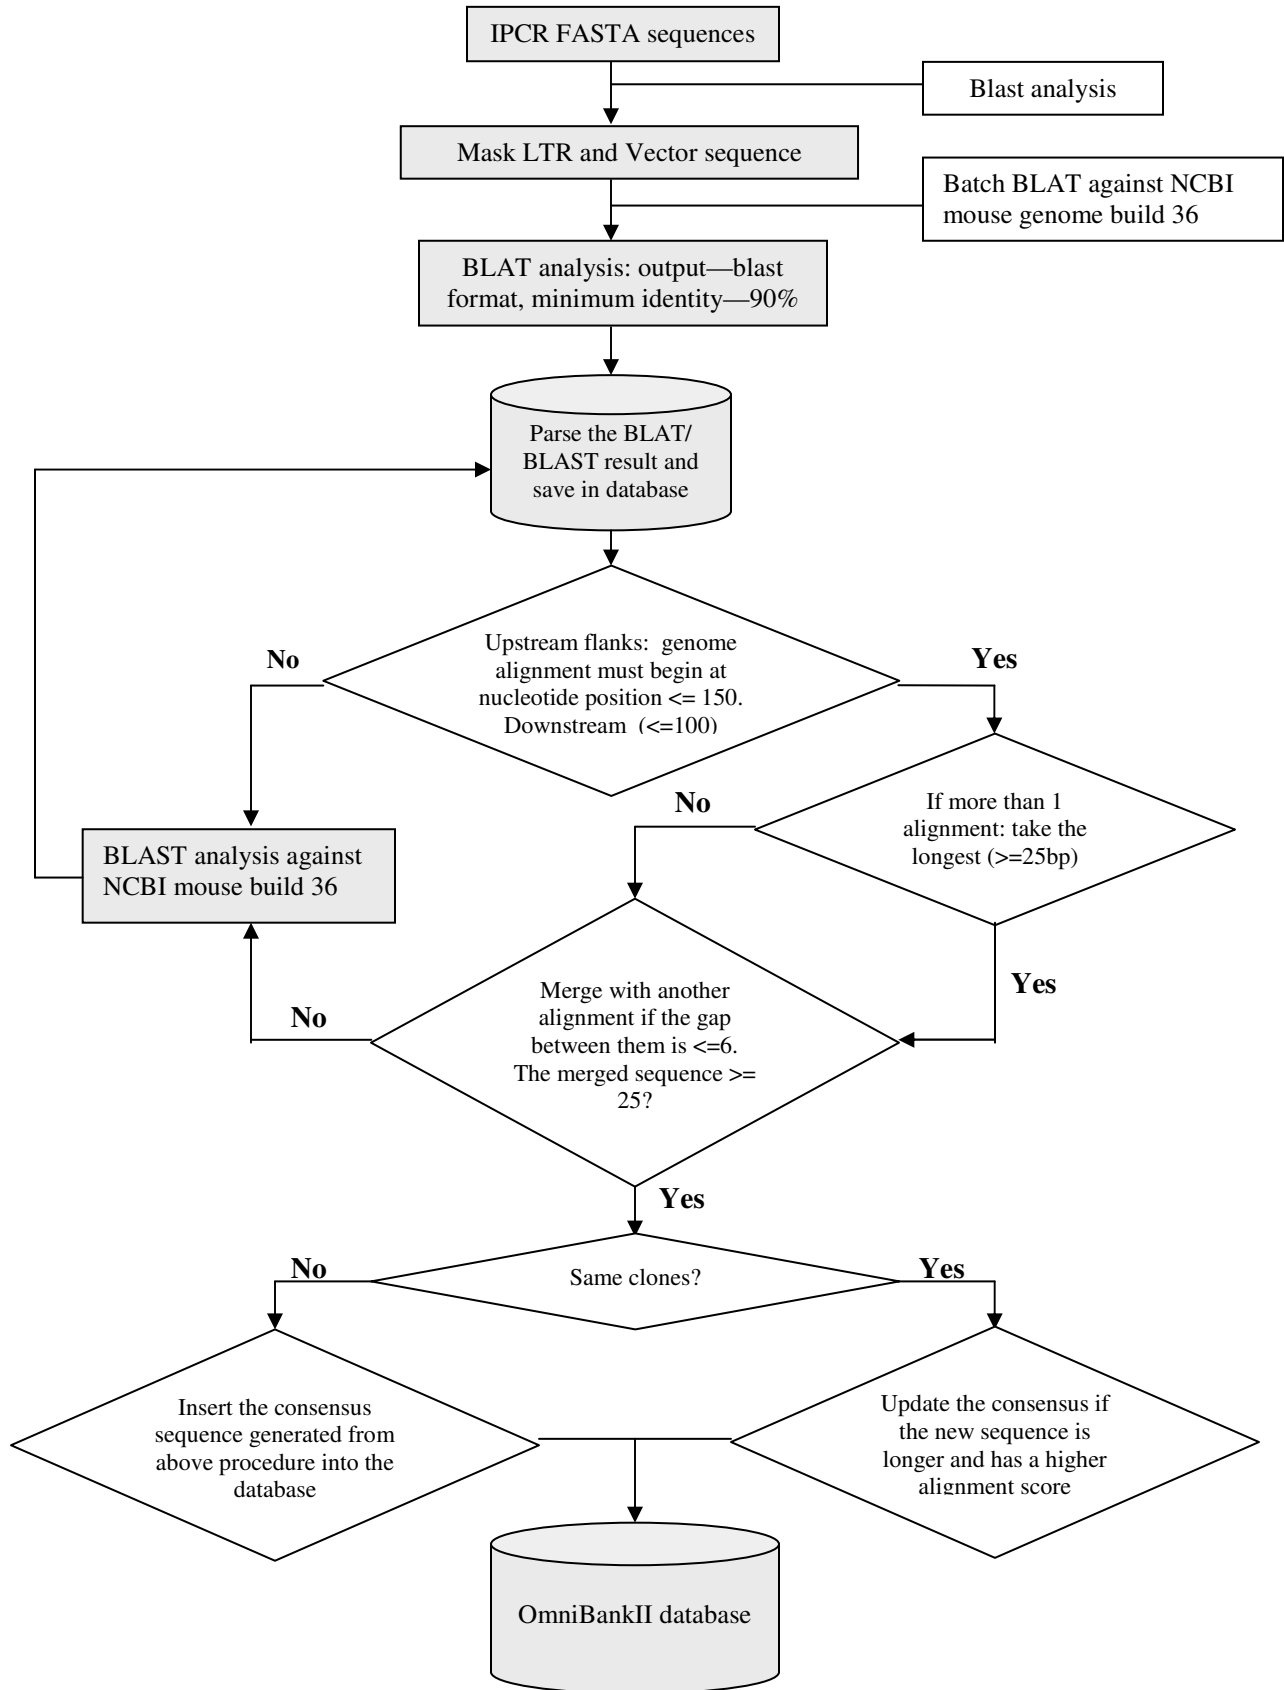

## 2. LTR sequence identification and consensus sequence status calling

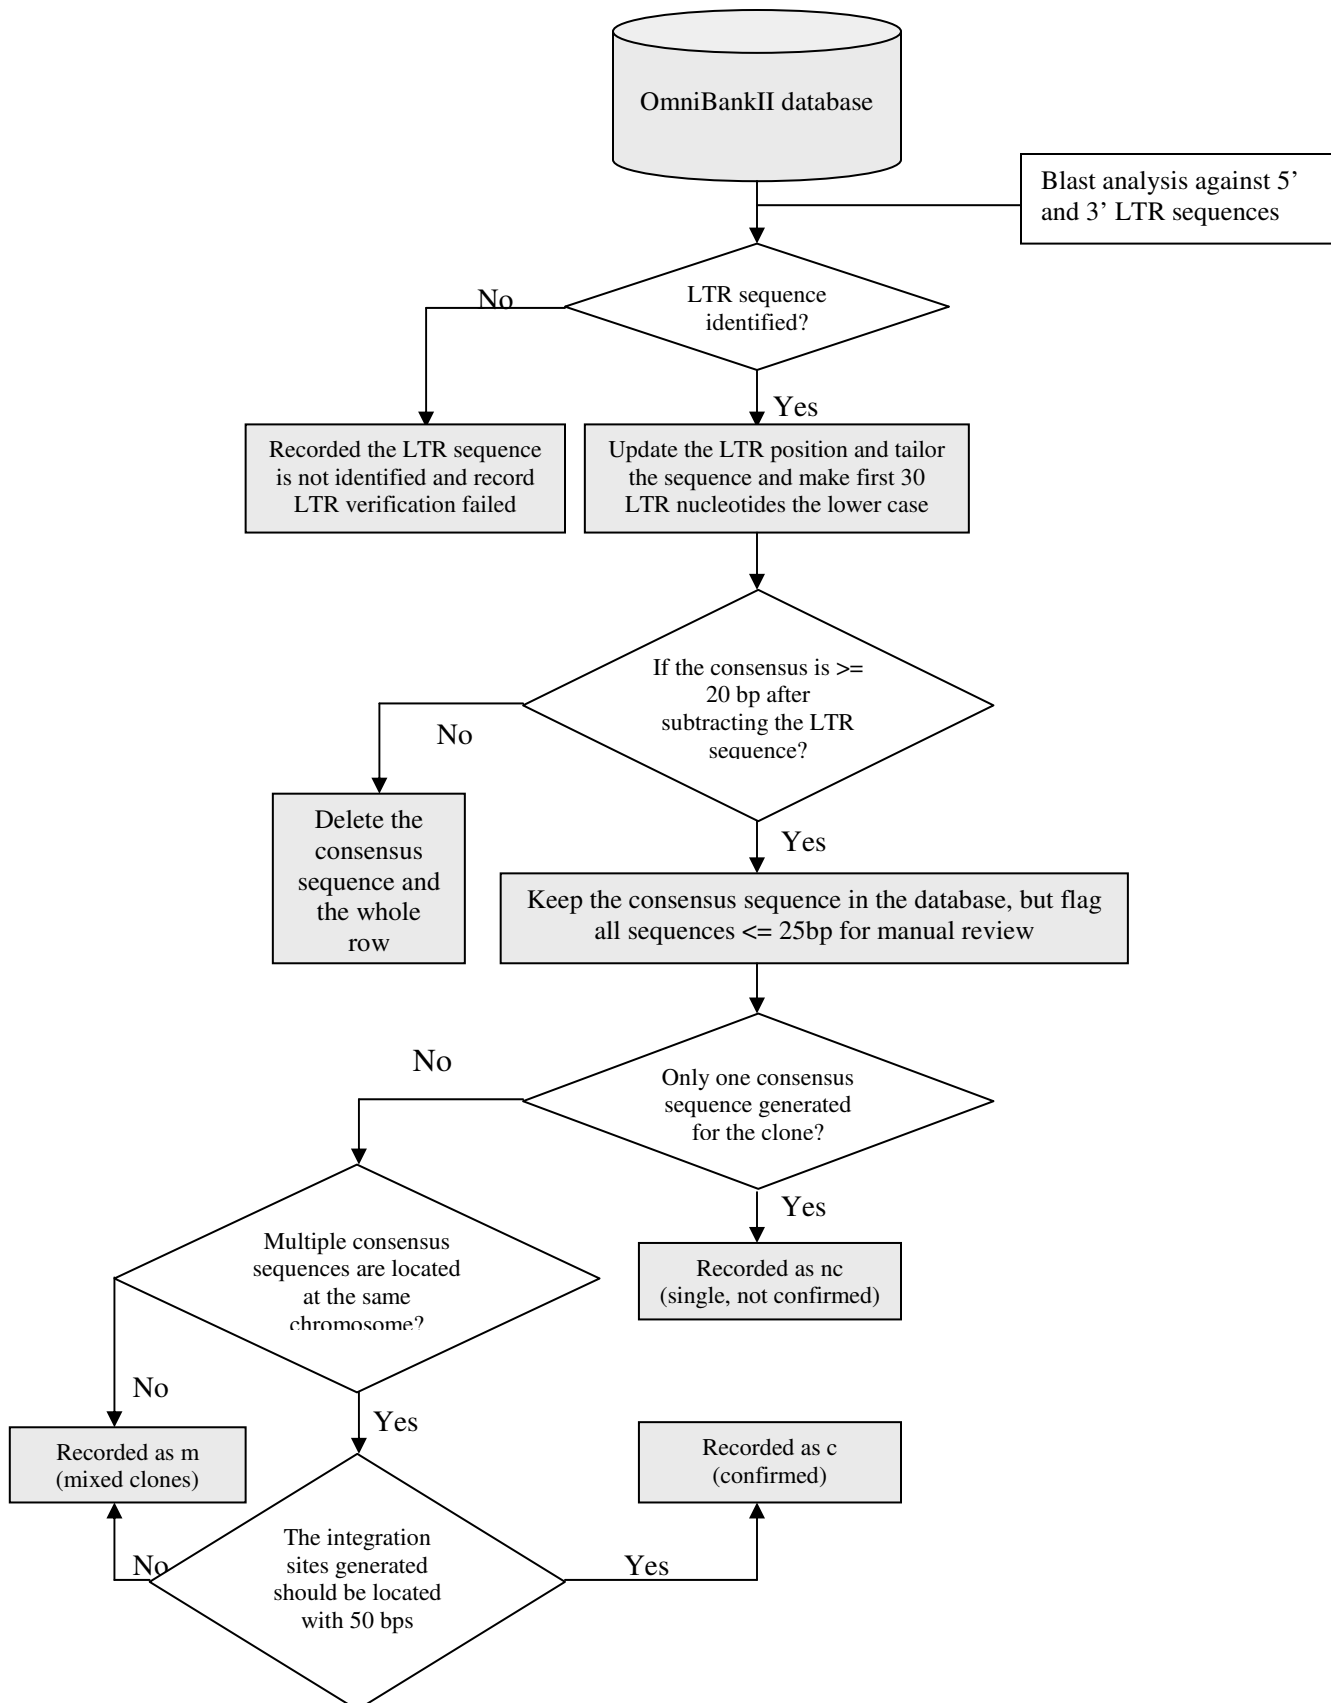

### 3. Sequence annotation

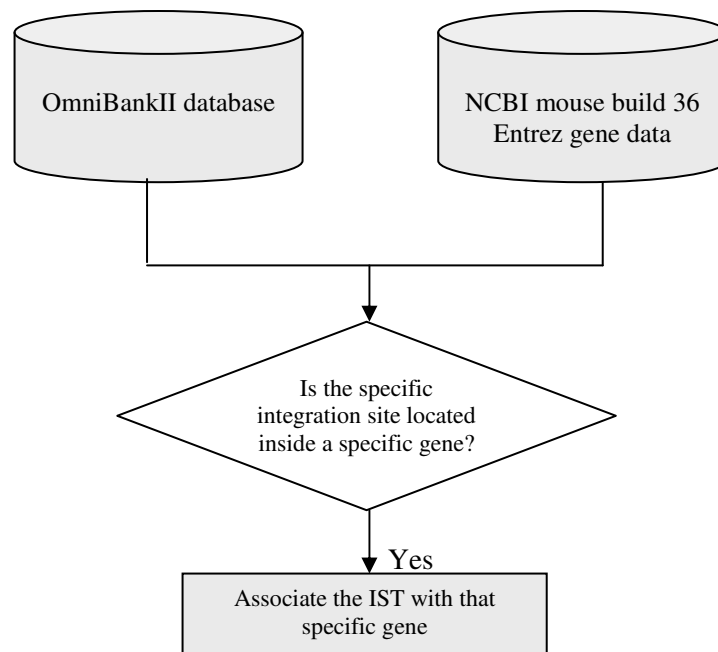

Supplement: Supplemental_Figure_1.pdf [file Supplemental_Figure_1.pdf]
