# Supplementary material for: Large-scale gene trapping in C57BL/6N mouse embryonic stem cells
Source: HighWire-hosted journal article supplement (doi:10.1101/gr.078352.108), 2008-09-17
Supplement: Supplemental_Figure_4.pdf [file Supplemental_Figure_4.pdf]

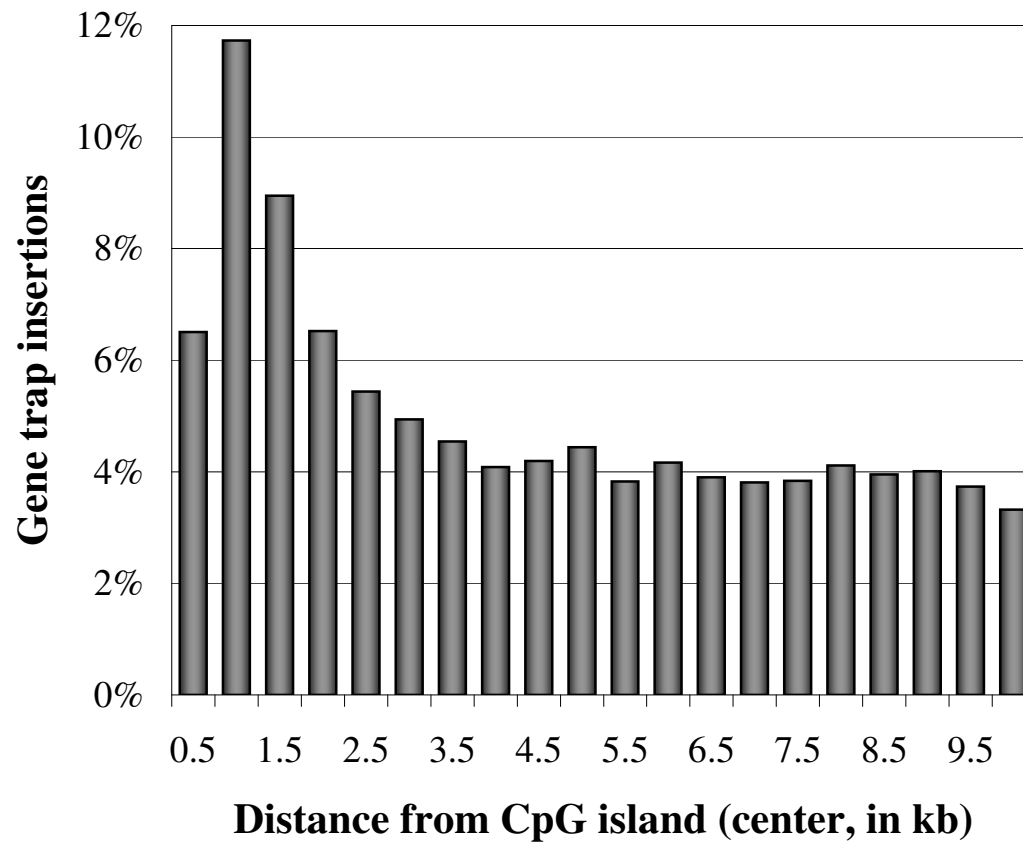

**Supplemental Figure 4.** OmniBankII gene trap insertions show a bias toward CpG islands. All insertions occurring within a 10Kb interval surrounding CpG islands were queried from the OmniBankII dataset and used to plot the percentage of insertions occurring within 500 bp intervals from the CpG island midpoint. CpG island genome map locations were obtained from the UCSC database using the Table Browser.
