# Supplementary material for: Large-scale gene trapping in C57BL/6N mouse embryonic stem cells
Source: HighWire-hosted journal article supplement (doi:10.1101/gr.078352.108), 2008-09-17
Supplement: Supplemental_Figure_5.pdf [file Supplemental_Figure_5.pdf]

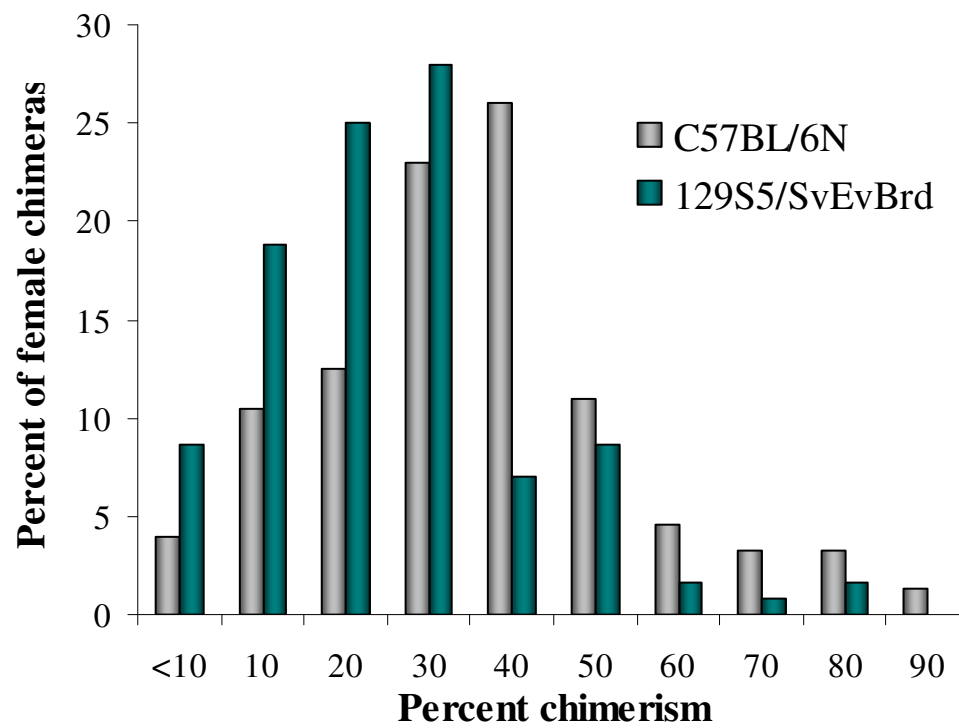

**Supplemental Figure 5.** Distribution of female chimeras by percent coat color chimerism. C57BL/6N, n= 152, median = 35%; 129S5/SvEvBrd n = 128, median = 20%.
