# Supplementary material for: Large-scale gene trapping in C57BL/6N mouse embryonic stem cells
Source: HighWire-hosted journal article supplement (doi:10.1101/gr.078352.108), 2008-09-17
Supplement: Supplemental_Figure_6.pdf [file Supplemental_Figure_6.pdf]

A)

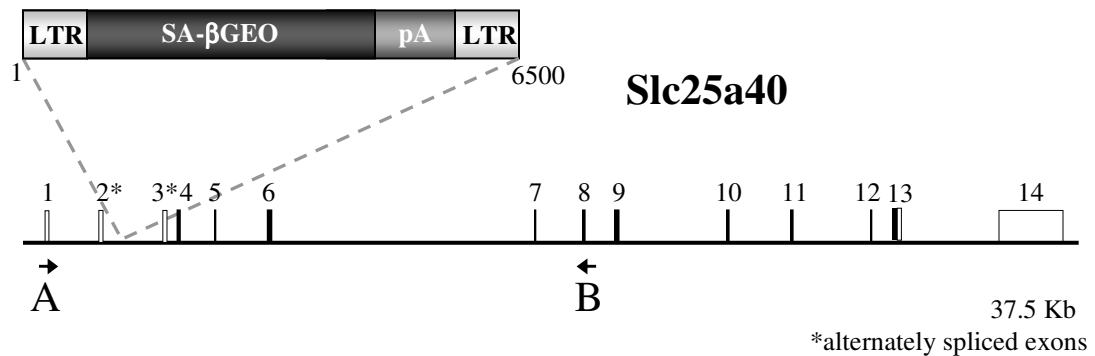

B)

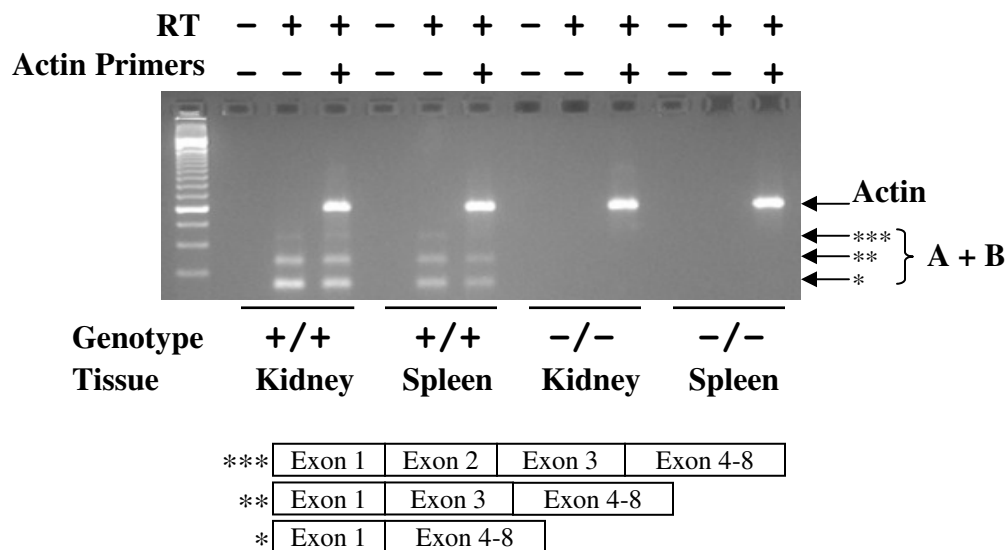

**Supplemental Figure 6.** Transcriptional disruption of the *Slc25a40* gene. A) *Slc25a40*-deficient mice were generated from OmniBankII ES cell clone IST10006D1 which contains a gene trapping vector insertion in the second intron of *Slc25a40* (accession NM\_178766). LTR, long terminal repeat; SA, splice acceptor sequence; bGEO translational fusion of the beta galactosidase gene and the neomycin phosphotransferase gene; pA polyadenylation sequence. Open boxes represent noncoding exons, filled boxes represent coding exons. B) RT-PCR analysis of the *Slc25a40* transcript using primers (A and B) complementary to the first and eighth exons of the *Slc25a40* gene. Three endogenous *Slc25a40* transcripts were detected in the kidney and spleen of wild-type (+/+) mice. No transcripts were detected in homozygous (-/-) tissues.
